# Supplementary material
Source: Springer Nature journal article supplement (https://www.springermedizin.de/resource/supplementary/13023_2013_597_MOESM5_ESM.pdf/9642494)

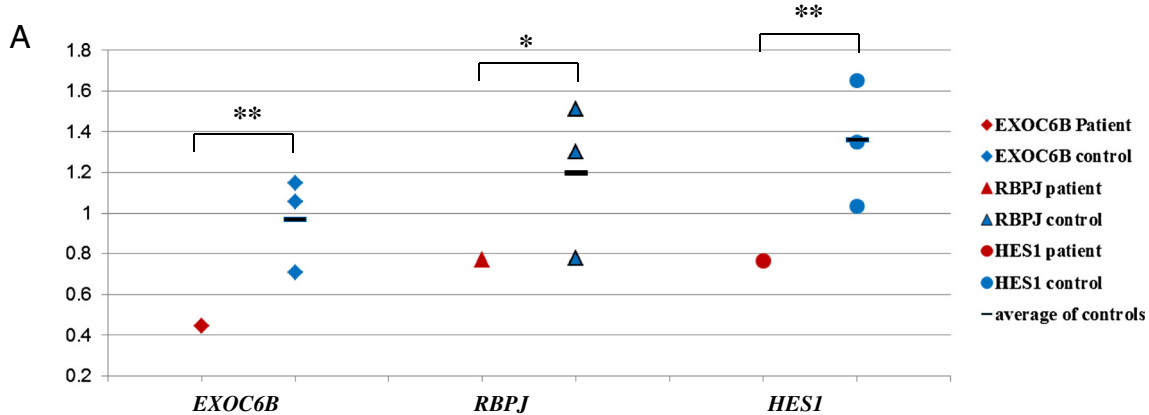

**B**

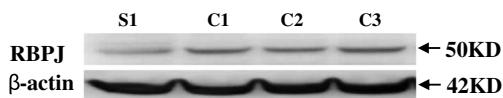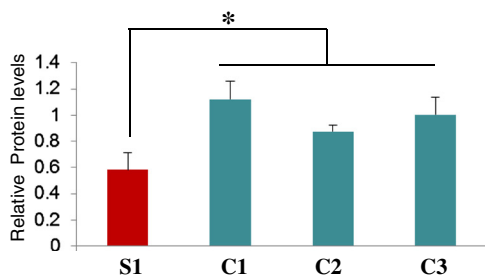

**C**

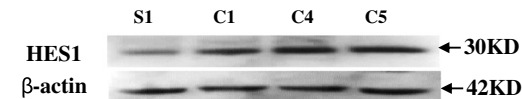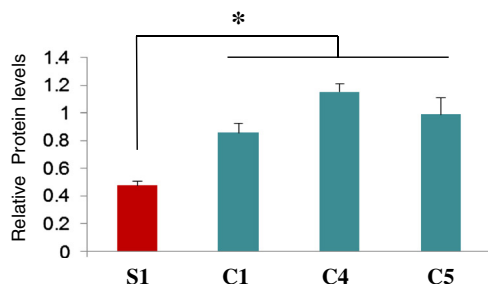

Supplement: MOESM5 [file 9642494]
